# Supplementary material
Source: PubMed Central journal article supplement (PMC2878537)

## SUPPLEMENTAL DATA

### Kinetic Analysis of the Three-step Steroid Aromatase Reaction of Human Cytochrome P450 19A1

Christal D. Sohl and F. Peter Guengerich  
*J. Biol. Chem.* **285**, 000-000 (2010)

## CONTENTS

FIGURE S1. cDNA optimization for P450 19A1 expression in *E. coli*.

FIGURE S2. Immunoblot of P450 19A1.

FIGURE S3. Dynafit iterations for fitting stopped-flow spectroscopy binding data and steady-state titration data.

FIGURE S4.  $\text{Fe}^{2+}\cdot\text{CO}$  vs.  $\text{Fe}^{2+}$  difference spectrum in the presence and absence of 19-OH andro.

FIGURE S5. Sample HPLC radiochromatogram following incubation of P450 19A1 with radiolabeled andro.

FIGURE S6. Dynafit iterations for global fitting.

FIGURE S1. **cDNA optimization for P450 19A1 expression in *E. coli*.** *A*, cDNA sequence after optimization (note: a stop codon was inserted during the sequence corrections, *vide infra*). *B*, oligonucleotides used for synthon generation in polymerase cycling assembly.

# A

```

ATGGCCAAAAAACCTCTTCTAAAGGTCGTAACACGAAGGTA CTTCATC -50-
TATCCCGGGTCCCTGGTTACTGCATGGGCATCGGTCCGCTGATCTCTCAG -100-
GTCGTTTCCTGTGGATGGGTATTGGTTCTGCGTGCAACTACTACAACCGT -150-
GTTTACGGCGAATTCATGCGTGTGGATCTCTGGCGAAGAAACCCCTGAT -200-
TATCTCTAAGTCCAGCTCTATGTTCCACATCATGAAACACAACCACTACT -250-
CCTCTCGTTTTCGGCTCTAAACTGGGTCTGCAGTGCATTTGGTATGCACGAA -300-
AAAGGTATCATCTTCAATAACAACCCGGAGCTGTGGAAAACCAACCCGTCC -350-
GTTCTTTATGAAAGCGCTGTCTGGTCCGGGCTGGTTTCGTATGGTTACCG -400-
TTTGCCTGAATCTCTGAAAACCCACCTGGACCGTCTGGAAGAAGTCACC -450-
AATGAGTCCGGTTATGTTGACGTTCTGACCTGCTGCGTTCGTGTTATGCT -500-
GGACACCTCCAACACCCCTGTTCTGCGTATCCCGCTGGACGAATCTGCTA -550-
TCGTTGTTAAAATCCAGGGTTATTTGACGCGTGGCAGGCGCTGCTGATC -600-
AAGCCGGACATTTTCTTCAAAATTTCTTGGCTGTACAAAAGTACGAAAA -650-
GTCTGTAAAGACCTGAAGGACCGGATTTGAAGTTCTGATTTGCGGAGAAGC -700-
GTCGTCGTATCAGCACCGAAGAAAACTCGAAGAGTGCATGGACTTTGCG -750-
ACCGAGCTGATCCTGGCGGAAAAACGTGGTGACCTGACCCGTGAAAAACGT -800-
TAACCAGTGTATCCTCGAAATGCTGATCGCGGCACCGGACACCATGAGCG -850-
TTTCTCTGTTCTTCATGCTGTTCTCATCGCGAAACACCCGAACGTTGAG -900-
GAAGCGATCATCAAAGAAATCCAGACTGTTATTGGTGACGTGACATCAA -950-
AATTGACGACATCCAGAACTGAAAGTTATGGAAAACCTCATCTACGAGT -1000-
CTATGCGTTACCAGCCGGTTGTTGACCTGGTCATGCGTAAGGCGCTGGAG -1050-
GACGACGTTATTGACGGTTACCCGGTCAAAAAAGGTACCAATATCATCCT -1100-
GAACATCGGTCGTATGCACCGTCTCGAATCTTCCCGAAACCGAACGAAT -1150-
TCACCCTCGAGAATTTTGCGAAGAATGTTCCGTACCGTTACTTCCAGCCG -1200-
TTCCGCTTCGGTCCGCGTGGTTGCGCGGGTAAATACATCGCAATGGTTAT -1250-
GATGAAGGCCATCCTGGTTACTCTGCTGCGTTCGTTTCCACGTTAAAACCTC -1300-
TGCAGGGTCAGTGCCTTGAATCTATTTCAGAAAAATCCACGACCTCTCTCTG -1350-
CACCCGGACGAAACCAAGAATATGCTGGAGATGATCTTCACCCCGCGTAA -1400-
TTCTGACCGTTGCTGGAACACCATCATCACCACCATAACGAAGCTTAT -1450-

```

# B

| Primer | PCA primer sequence                                        |
|--------|------------------------------------------------------------|
| 1      | GGTGGTCATATGGCCAAAAAACCTCTTCTAAAGGTCGTA ACTAC              |
| 2      | ACCAGGACCCGGGATAGAGGAAGTACCTTCGTAGTTACGACCTTTAGAAGAGGT     |
| 3      | TCTATCCCGGGTCTGGTTACTGCATGGGCATCGGTCCGCTGATCTCTCACGGT      |
| 4      | GTTGCACGCAGAACCAATACCCATCCACAGGAAACGACCGTGAGAGATCAGCGG     |
| 5      | GTATTGGTTCTGCGTGCAACTACTACAACCGTGTTCAGGCGAATTCATGCGTG      |
| 6      | TAGAGATAATCAGGGTTTCTTCGCCAGAGATCCAAACACGCATGAATTCGCCGT     |
| 7      | GCGAAGAAACCTGATTATCTCTAAGTCCAGCTCTATGTTCCACATCATGAAGC      |
| 8      | TTAGAGCCGAAACGAGAGGAGTAATGGTTGTGCTTCATGATGGAACATAGAG       |
| 9      | TCCTCTCGTTTCGGCTCTAAACTGGGTCTGCAGTGCATTGGTATGCACGAAAA      |
| 10     | CCACAGCTCCGGGTTGTATTGAAGATGATACCTTTTTTCGTGCATACCAATGCA     |
| 11     | ACAACCCGGAGCTGTGGAAAACCCCGTCCGTTCTTTATGAAAGCGCTGTCTG       |
| 12     | GCAAACGGTAACCATAACGAAACAGACCCGGACCAGACAGCGCTTTCATAAAGAA    |
| 13     | GTTCGTATGGTTACCGTTTTCGCTGAATCTCTGAAAAACCCACCTGGACCGTCTG    |
| 14     | GAACGTCAACATAACCGGACTCATTGGTGACTTCTTCCAGACGGTCCAGGTGGG     |
| 15     | AGTCCGGTTATGTTGACGTTCTGACCCTGCTGCGTTCGTTATGCTGGACACCT      |
| 16     | TTCTGTCAGCGGGATACGCAGGAACAGGGTGTGGAGGTGTCAGCATAACACG       |
| 17     | CGTATCCCGCTGGACGAATCTGCTATCGTTGTTAAAAATCCAGGGTATTTTCGAC    |
| 18     | GTCCGGCTTGATCAGCAGCGCCTGCCACGCGTCGAAATAACCTGGATTTTAAC      |
| 19     | GTGCTGATCAAGCCGGACATTTCTTCAAATTTCTTGGCTGTACAAGAAGTAT       |
| 20     | CTTCTCATACTTCTTGTACAGCCAGGAAA                              |
| 21     | TCTTGGCTGTACAAAAAGTACGAAAAGTCTGTTAAAGACCTGAAGGACGCGATTG    |
| 22     | GGTGTGATACGACGACGCTTCTCCGCAATCAGA ACTTCAATCGCGTCTTCAGGTC   |
| 23     | CGTCGTGATCAGCACCGAAGAAAACTCGAAGAGTGCATGGACTTTCGACCCGAG     |
| 24     | TCACGGGT CAGGTACACAGT TTTTCCGCCAGGATCAGCTCGGTCCGAAAGTCCATG |
| 25     | GGTGACCTGACCCGTGAAAACGTTAACACAGCGTATCCTCGAAATGCTGATCGCGGCA |
| 26     | GGAACAGCATGAAGAACAGAGAAACGCTCATGGTGTCCGGTCCCGCATCAGCATTT   |
| 27     | CTCTGTTCTCATGCTGTTCTTCATCGCGAAACACCCGAACTGAGGAAGCGATCA     |
| 28     | ATGTCACGTTACCAATAACAGTCTGGATTTCTTTGATGATCGCTTCTTCAACGTTT   |
| 29     | CTGTTATTGGTGAACGTGACATCAAAATGACGACATCCAGAACTGAAAGTTATGG    |
| 30     | GCTGGTAACGCATAGACTCGTAGATGAAGTTTCCATAACTTTCAGTTTCTGGATGT   |
| 31     | CGAGTCTATGCGTTACCAGCCGGTTGTTGACCTGGTCAATGCGTAAGGCGTGGAGGA  |
| 32     | ATTGGTACCTTTTTTGACCCGGTAACCGTCAATAACGTCGTCCTCCAGCGCCTTACG  |
| 33     | CCGGTCAAAAAGGTACCAATATCATCCTGAACATCGGTCGTATGCACCGTCTCGAA   |
| 34     | AAATTCGAGGGTGAATTCGTTTCGGTTTCGGGAAGAATTCGAGACGGTGCATACGA   |
| 35     | ACGAATTCACCTCGAGAATTTGCGAAGAATGTTCCGTACCGTTACTTCCAGCCGT    |
| 36     | CGATGATTTACCCGCGCAACCACGCGGACCGAAGCCGAAACGGTGGAAAGTAACGGT  |
| 37     | TGCGCGGGTAAATACATCGCAATGGTTATGATGAAGCCATCTCGGTTACTCTGCTG   |
| 38     | CGCACTGACCCTGCAGAGTTTAACTGGAAACGACGACGAGAGTAACAGGATGG      |
| 39     | TCTGCAGGGTCAGTGCCTGGAATCTATTCAGAAAATCCACGACCTCTCTCTGACCC   |
| 40     | GGGGTGAAGATCATCTCCAGCATATCTTGGTTTCGTCGGGTGCAGAGAGAGGTTCG   |
| 41     | CTGGAGATGATCTTACCCCGCTTCTCTGACCGTTGCTGGAACACCATCATCAC      |
| 42     | TTTGTATCAATAAGCTTGTGGTGGTGTATGATGATGGTGTTCAGACA            |

Note: a stop codon was inserted via site-directed mutagenesis after synthon ligation.

**FIGURE S2. Immunoblot of P450 19A1.** Four dilutions of purified P450 19A1 were loaded for sodium dodecyl sulfate-polyacrylamide gel electrophoresis (10%, w/v), along with seven dilutions of a P450 3A4 standard that also contained a hexa-histidine tag. The proteins were transferred to a polyvinylidene fluoride membrane (BioRad, Hercules, CA). A primary mouse anti-his<sub>6</sub>-peroxidase antibody was used (Roche, San Francisco, CA) to detect the presence of protein containing a hexa-histidine tag. The secondary antibody was goat anti-mouse IRD800CW, which emits infrared light at 800 nm, and was detected using an Odyssey Li-Cor instrument (Li-Cor, Lincoln, NE). Shown in the first four lanes are various dilutions of purified P450 19A1. The final seven lanes contain P450 3A4 with a hexa-histidine tag as a standard for quantitation (shown are 1, 2, 4, 8, 10, 12, and 16 pmol P450 3A4). The output from the channel detecting the infrared signal at 800 nm is shown.

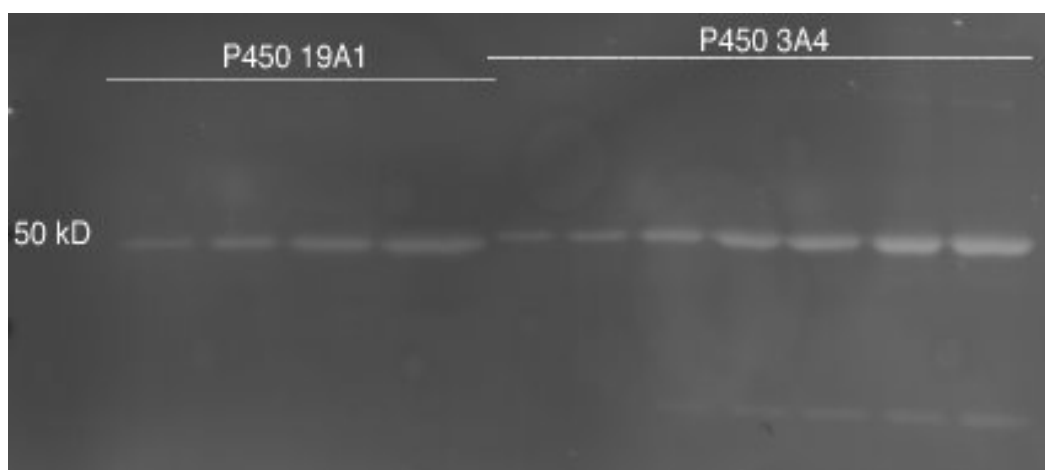

**FIGURE S3. Dynafit iterations for fitting stopped-flow spectroscopy binding data and steady-state titration data.** *A*, Dynafit script for fitting the binding of andro (Fig. 5A). *B*, Dynafit script for fitting the steady-state titration data (andro, Fig. 4A), using  $K_d$  values generated from *A*. *C*, fit resulting from script from *B*. *D*, Dynafit script for fitting the binding of 19-OH andro (Fig. 5B). *E*, Dynafit script for fitting the steady-state titration data (19-OH andro, Fig. 4B), using  $K_d$  values generated from *D*. *F*, fit resulting from script in *E*. *G*, Dynafit script for the binding of 19=O andro (Fig. 5C). *H*, Dynafit script for fitting the steady-state titration data (19=O andro, Fig. 4C), using  $K_d$  values generated from *G*. *I*, fit resulting from script in *H*.

**A**

```

;Christal Sohl & P450 19A1
;Kinetics of ligand binding
;All units in uM & s
;A390 SF data
;Andro

```

;Run 32

[task]

data = progress  
task = fit

[mechanism]

$E + L \rightleftharpoons EL$  : k1 k-1  
 $EL \rightleftharpoons LE$  : k2 k-2

[constants]

k1 = 5, k-1 = 1.4  
k2 = 0.42, k-2 = 0.2

[concentrations]

E = 2  
L = 2

[responses]

EL = 0  
LE = 0.07

[sweep]

mesh linear from 0 to 30 step 0.032

[progress]

directory ./scripts  
extension txt  
file 2v2andro1

[output]

directory ./projects/ANDRO0909/run32

[end]

## B

;Christal Sohl & P450 19A1

;Kinetics of ligand binding

;All units in uM & s

;Andro

;Run 31

[task]

data = equilibria  
task = fit

[mechanism]

$E + L \rightleftharpoons EL$  : K1 dissociation  
 $EL \rightleftharpoons LE$  : K2 dissociation

[constants]

K1 = 0.28  
K2 = 2.1

[concentrations]

```
E = 1
[responses]
  EL = 0
  LE = 0.08
[sweep]
[equilibria]
  variable L = 0 to 4.4 step 0.001
  file ./scripts/androquadfit1.txt
[output]
  directory ./projects/ANDRO0909/run31
[end]
```

**C**

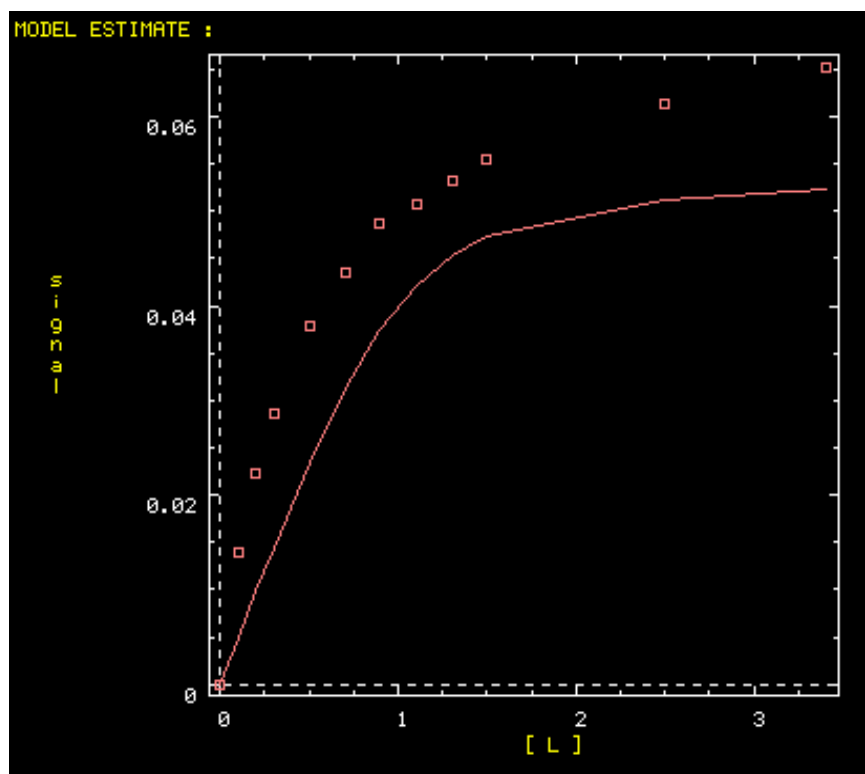

**D**

```
;Christal Sohl & P450 19A1
;Kinetics of ligand binding
;All units in uM & s
;A390 SF data
;19-OH andro
;Run 64
```

```

[task]
  data = progress
  task = fit

[mechanism]
  E + L <==> EL      :      k1      k-1
  EL <==> LE      :      k2      k-2

[constants]
  k1 = 40, k-1 = 240
  k2 = 0.8, k-2 = 0.15

[concentrations]
  E = 2
  L = 2

[responses]
  EL = 0
  LE = 0.065

[sweep]
  mesh linear from 0 to 30 step 0.032

[progress]
  directory ./scripts
  extension txt
  file      2v219OH1

[output]
  directory ./projects/19OH0909/run64

[end]

```

## E

```

;Christal Sohl & P450 19A1
;Kinetics of ligand binding
;All units in uM & s
;titration data
;19-OH andro
;Run 61

```

```

[task]
  data = equilibria
  task = fit

[mechanism]
  E + L <==> EL      :      K1 dissoc.
  EL <==> LE      :      K2 dissoc.

[constants]
  K1 = 6

```

```
      K2 = 5.5
[concentrations]
      E = 1
[responses]
      EL = 0
      LE = 0.0255
[sweep]
[equilibria]
      variable L = 0 to 7.5 step 0.001
      file ./scripts/19OHquadfit1.txt
[output]
      directory ./projects/19OH0909/run61
[end]
```

**F**

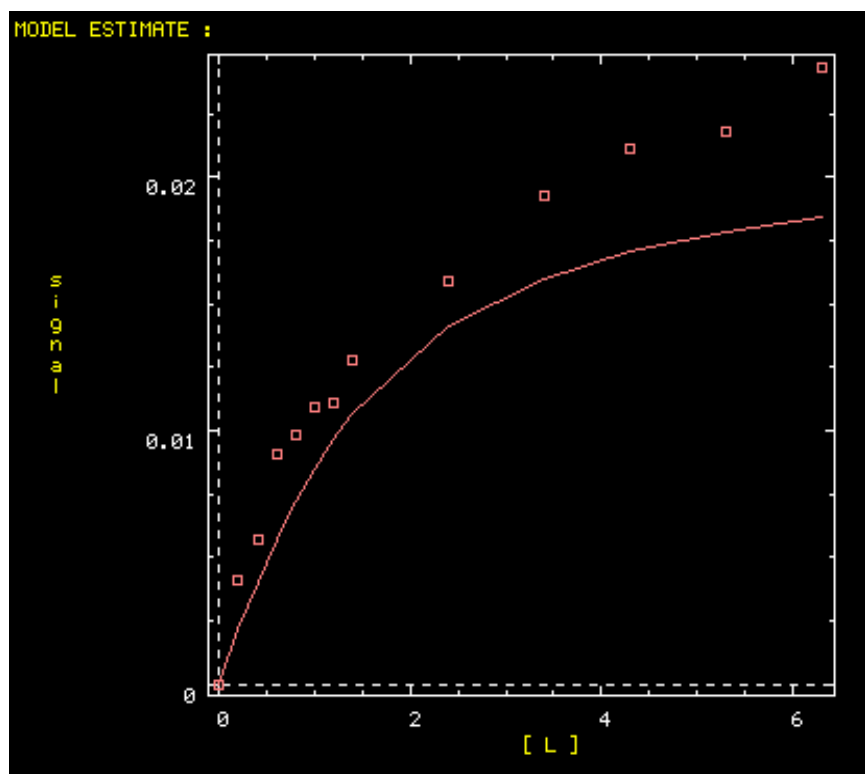

**G**

```
;Christal Sohl & P450 19A1
;Kinetics of ligand binding
;All units in uM & s
```



```
;A390 SF data
;19=O aldo
;Run 14
```

```
[task]
    data = progress
    task = fit
[mechanism]
    E + L <==> EL      :      k1      k-1
    EL <==> LE      :      k2      k-2
[constants]
    k1 = 5, k-1 = 300
    k2 = 2.4, k-2 = 0.13
[concentrations]
    E = 2
    L = 2
[responses]
    EL = 0
    LE = 0.06
[sweep]
    mesh linear from 0 to 30 step 0.032
[progress]
    directory ./scripts
    extension txt
    file      2v2aldo
[output]
    directory ./projects/ALDO091109/run14
[end]
```

## H

```
;Christal Sohl & P450 19A1
;Kinetics of ligand binding
;All units in uM & s
;sf data
;19=O andro
;Run 16
```

```
[task]
    data = equilibria
    task = fit
[mechanism]
    E + L <==> EL      :      K1 dissoc.
    EL <==> LE      :      K2 dissoc.
```

[constants]

K1 = 60

K2 = 18

[concentrations]

E = 1

[responses]

EL = 0

LE = 0.028

[sweep]

[equilibria]

variable L = 0 to 19.4 step 1

file ./scripts/aldoquadfit.txt

[output]

directory ./projects/ALDO091109/run16

[end]

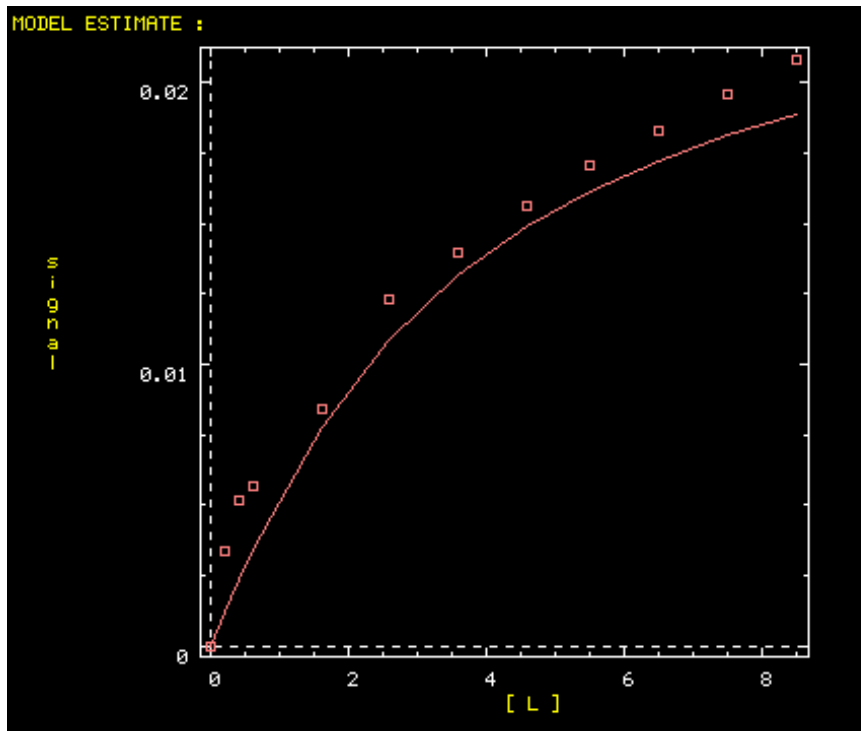

FIGURE S4.  $\text{Fe}^{2+}\cdot\text{CO}$  vs.  $\text{Fe}^{2+}$  difference spectra in the absence and presence of 19-OH andro. P450 19A1 ( $1\ \mu\text{M}$ ) in the absence and presence of 19-OH andro ( $20\ \mu\text{M}$ ).

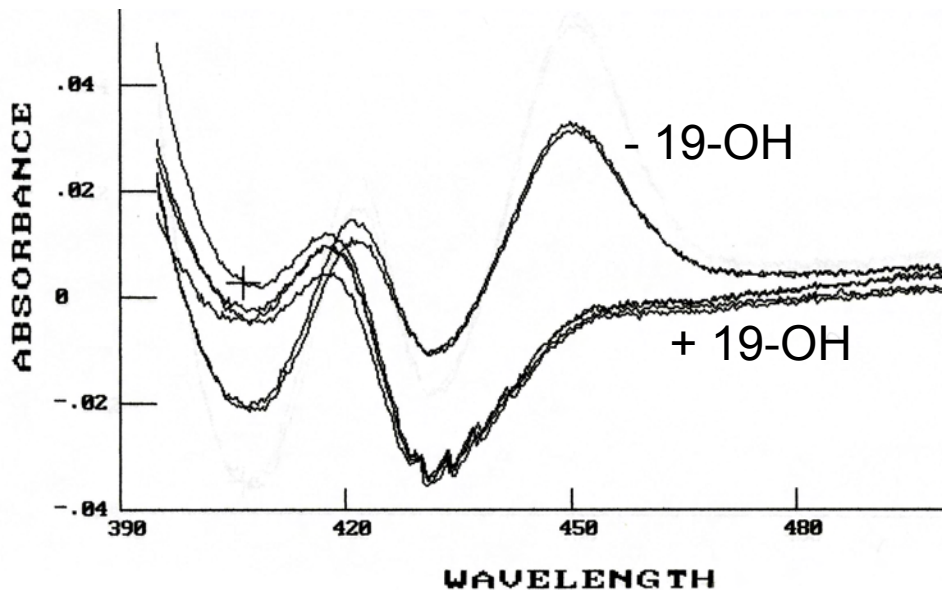

FIGURE S5. Sample HPLC radiochromatogram following incubation of P450 19A1 with radiolabeled andro. Shown are 19-OH andro at  $t_R = 3.6$  min, 19=O andro at  $t_R = 4.5$  min, andro at  $t_R = 5.8$  min, and estrone at  $t_R = 7.8$  min.

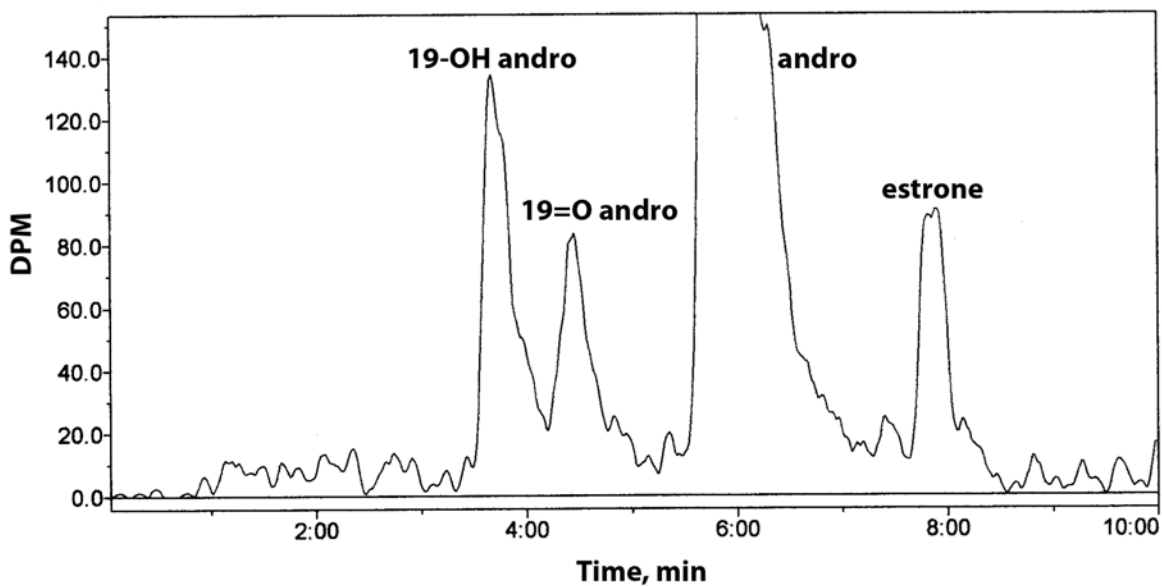

FIGURE S6. **Dynafit iterations for global fitting.** *A*, Dynafit script for fitting conversion of 19-OH andro to estrone. *B*, resulting fit for the conversion of 19-OH andro to estrone using rate constants from the single turnover experiment fit (Fig. 9, Table 3). *C*, Dynafit script for fitting conversion of 19=O andro to estrone. *D*, resulting fit for the conversion of 19=O andro to estrone, using rate constants from the single turnover experiment fit (Fig. 9, Table 3).

## A

```
;Christal Sohl
;All units in uM, s
;A = andro, B = 19-OH andro, C = 19=O andro, D = estrone, E = 19A1
;19-OH v vs s
```

```
[task]
  data = velocities
  task = fit
[mechanism]
  B + E <==> EB      :      k1      k-1
  EB <==> BE         :      k2      k-2
  BE --> EC          :      k3
  EC <==> E + C      :      k4      k-4
  EC <==> CE         :      k5      k-5
  CE --> ED          :      k6
  ED <==> E + D      :      k7      k-7
[constants]
  k1 = 70,          k-1 = 39000
  k2 = 24300,      k-2 = 320
  k3 = 7.5
  k4 = 50, k-4 = 80
  k5 = 32000, k-5 = 30000
  k6 = 5.9
  k7 = 12900, k-7 = 90
[concentrations]
  E = 0.6
[progress]
  delay = 0.01
[sweep]
[velocity]
  variable B = 0, 8, 12, 15, 20, 40, 60, 100, 200, 300
  file ./scripts/19OHinsec.txt
  responses D = 1
[output]
  directory ./projects/19A101211019OH/run215
[end]
```

# B

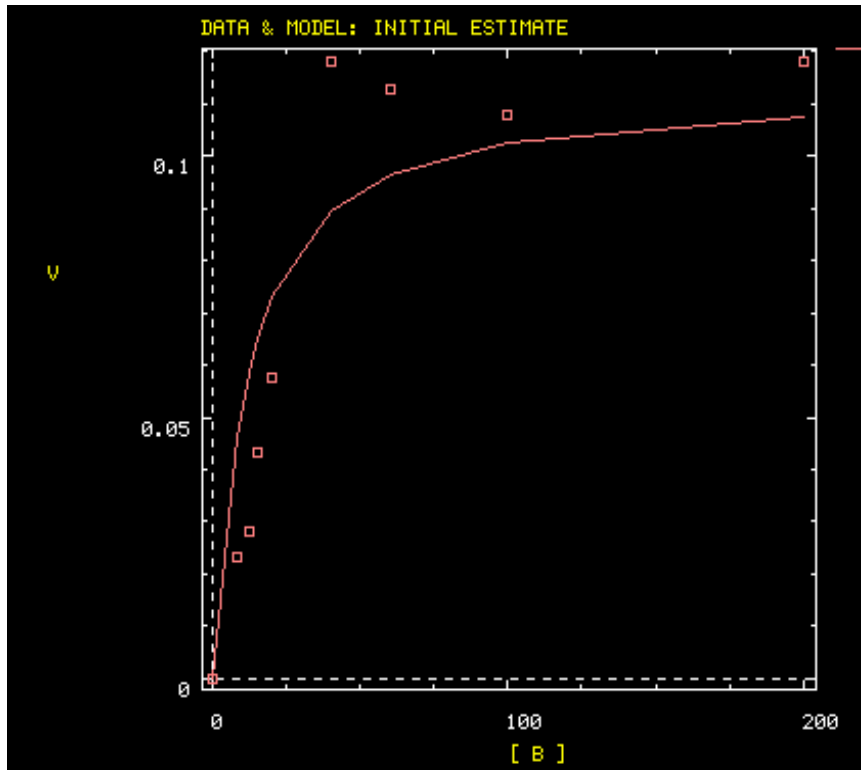

# C

;Christal Sohl  
;All units in uM, s  
;A = andro, B = 19-OH andro, C = 19=O andro, D = estrone, E = 19A1  
;19=O v vs s

[task]

data = velocities

task = fit

[mechanism]

E + C <=> EC : k1 k-1

EC <=> CE : k2 k-2

CE --> ED : k3

ED <=> E + D : k4 k-4

[constants]

k1 = 80, k-1 = 50

k2 = 32000, k-2 = 30000

```
k3 = 5.9
k4 = 12900, k-4 = 90
[concentrations]
E = 0.1
[progress]
delay = 0.01
[sweep]
[velocity]
variable C = 0, 1, 5, 10, 15, 20, 40, 60, 100, 200, 300
file ./scripts/19Oinpersec.txt
responses D = 1
[output]
directory ./projects/19A101211019O/run240
[end]
```

## D

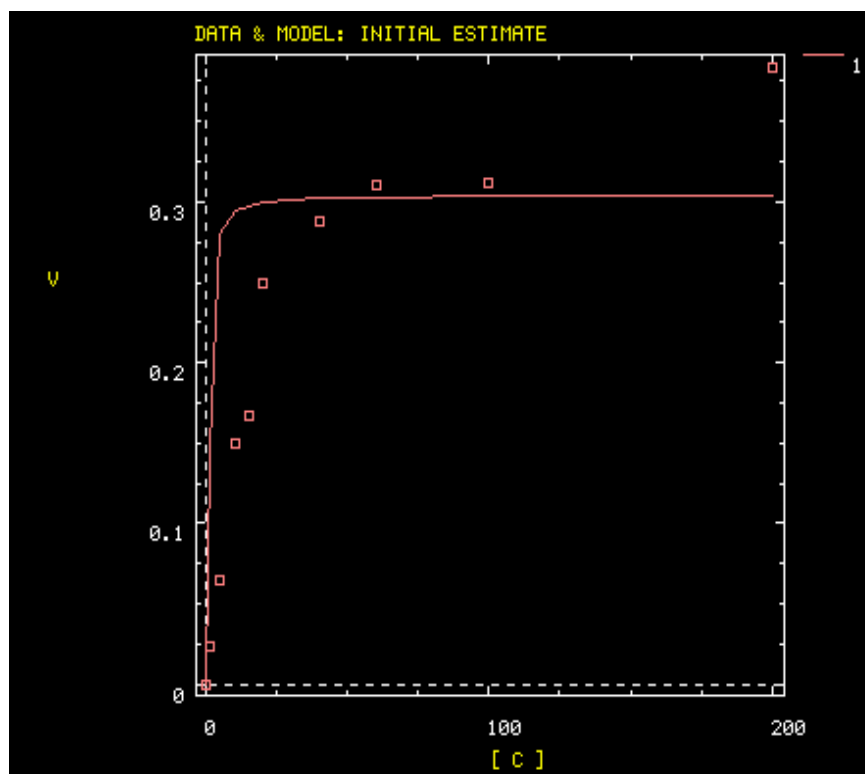

Supplement: supp_M110.123711_jbc.M110.123711-1.pdf [file supp_M110.123711_jbc.M110.123711-1.pdf]
